# Supplementary material for: A novel 3-connected [3 + 3] topological net showing both rotaxane- and catenane-like motifs
Source: Royal Society of Chemistry journal article supplement (doi:10.1039/c1ce05277b), 2011-01-01
Supplement: c1ce05277b.pdf [file c1ce05277b.pdf]

**A novel 3-connected [3+3] topological net showing both rotaxane- and  
catenane-like motifs**

Shun-Li Li,<sup>†</sup> Ke Tan,<sup>‡</sup> Ya-Qian Lan,<sup>†</sup> Jun-Sheng Qin,<sup>†</sup> Mei-Na Li,<sup>†</sup> Dong-Ying Du,<sup>†</sup>  
and Zhong-Min Su<sup>\*,†</sup>

*Institute of Functional Material Chemistry; Key Lab of Polyoxometalate Science of  
Ministry of Education, Faculty of Chemistry, Northeast Normal University,  
Changchun, 130024, People's Republic of China; Biological Scientific and Technical  
College, Changchun University, Changchun, 130022, People's Republic of China.*

*E-mail: zmsu@nenu.edu.cn; Tel: +86 431 85099108*

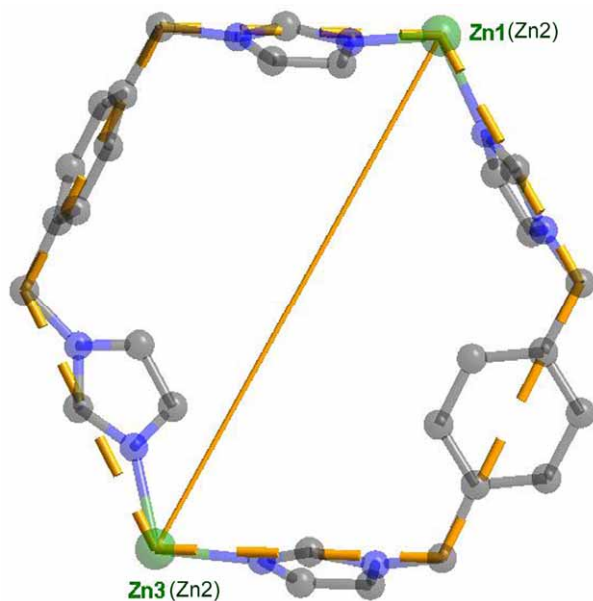

**Fig. S1** Ball-and-stick representation of  $[\text{Zn}(\text{bib})_2\text{Zn}]$  26-membered loop in **1**.

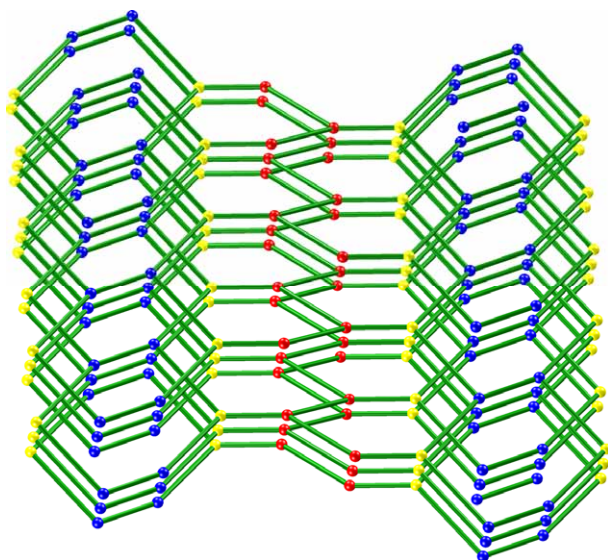

**Fig. S2** Schematic view of the topological structure of the single net for **1**.

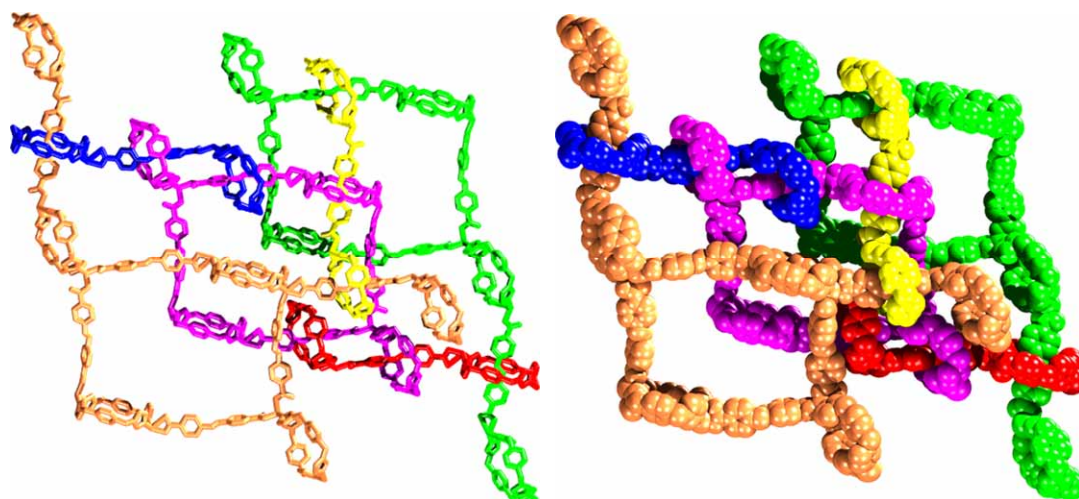

**Fig. S3** Ball-stick and schematic representations of the coexistence with both both polyrotaxane and polycatenane characters.

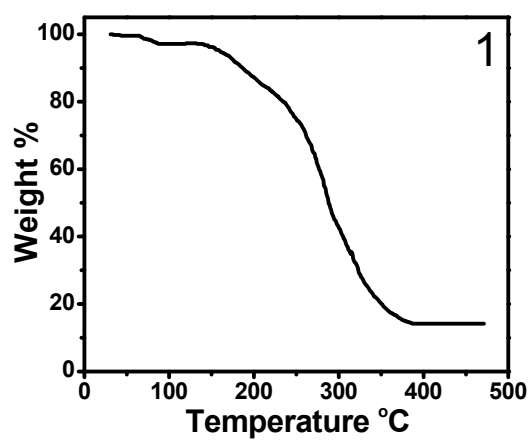

**Fig. S4** TGA curve of compound 1.
